# Supplementary material
Source: PubMed Central journal article supplement (PMC6759306)
Supplement: IAI.00562-19-s0001.pdf [file IAI.00562-19-s0001.pdf]

## Supplementary Material

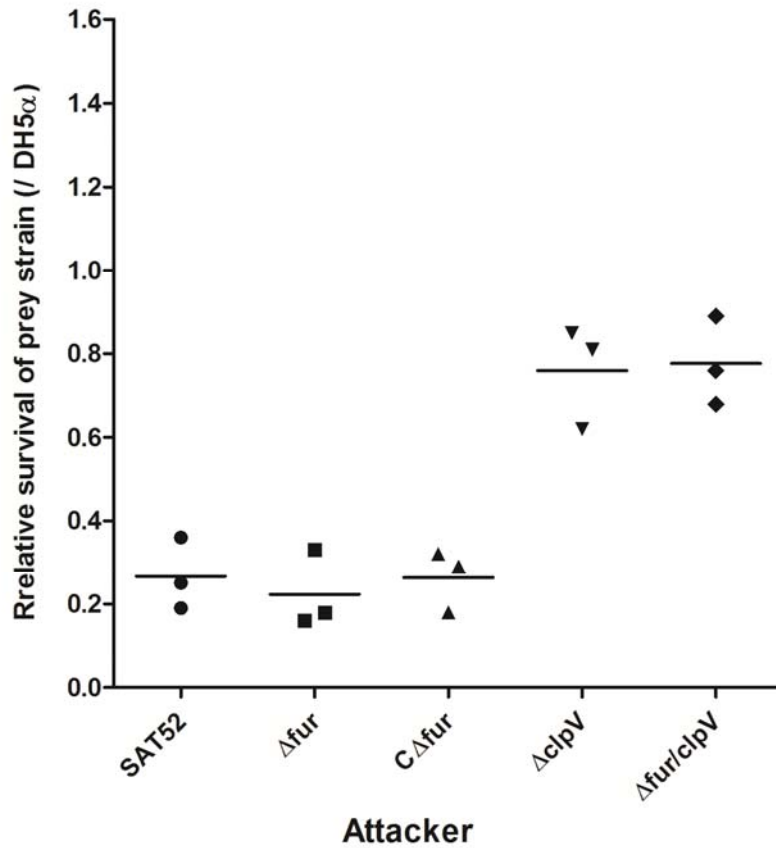

**Figure S1. Interbacterial competition assay in the iron depleted medium.** The prey strain *E. coli* DH5 $\alpha$  was mixed with the indicated attacker cells at a ratio of 1:4 in the iron depleted medium and plates. After incubation for 4 h at 37 °C, the surviving *E. coli* DH5 $\alpha$  were recovered and enumerated. The ratio compared to prey strain *E. coli* DH5 $\alpha$  was calculated as relative survival. Statistical significance was assessed using one-way ANOVA.

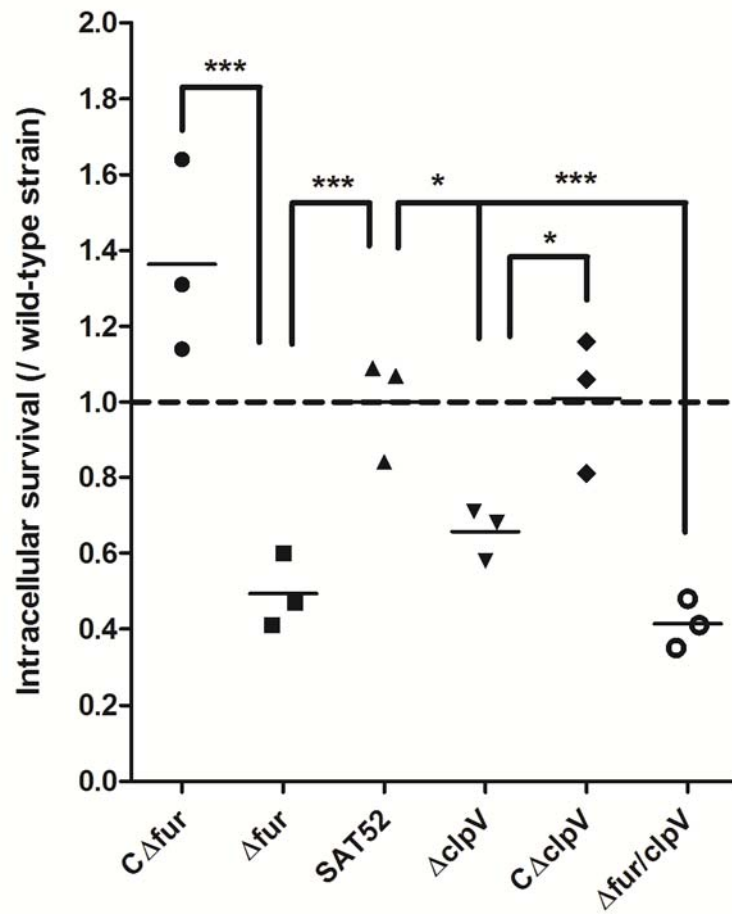

**Figure S2.** Assessment of intra-macrophage survival of *S. Typhimurium* in the iron excess DMEM. Intracellular survival of bacteria in RAW264.7 cells was expressed as a fraction of the wild-type strain at 10 h post-invasion. Decreased intracellular survival for the mutant strains was observed, whereas the complemented strain restored the capacity of intracellular survival. Statistical significance was assessed using one-way ANOVA. (\*,  $P < 0.05$ ; \*\*\*,  $P < 0.001$ ).
